# Supplementary material for: MLL3 and MLL4 Methyltransferases Bind to the MAFA and MAFB Transcription Factors to Regulate Islet β-Cell Function
Source: Oxford University Press journal article supplement (doi:10.2337/db15-0281), 2015-07-15
Supplement: db150281supplementarydata2.xlsx [file db150281supplementarydata2.xlsx]

## Sheet: Table1
Immunoprecipitation
Target	Host		Company and Catalog #
IgG	Rabbit		Bethyl #P120-101
MAFA (mouse and human)	Rabbit		Bethyl #A300-BL1225
Flag	Mouse		Sigma #F1804
NCoA6	Rabbit		Bethyl #A300-410A
MAFB	Rabbit		Bethyl #A300-BL658
Western Blot
Target	Host	Concentration	Company and Catalog #
MAFA	Rabbit	1:1000	Bethyl #A300-BL1225
p/CAF	Mouse	1:1000	Santa Cruz #13124
Pdx-1	Rabbit	1:10000	Provided by Dr. Chris Wright
RBBP5	Mouse	1:2000	Santa Cruz #271072
NCOA6	Rabbit	1:1000	Bethyl #A300-410A
WDR5	Rabbit	1:1000	Santa Cruz #135245
UTX	Rabbit	1:1000	Bethyl #A302-374A
Nkx6.1	Mouse	1:1000	Developmental Studies Hybridoma Bank
HNF1α	Goat	1:1000	Santa Cruz #6548
Nkx2.2	Goat	1:1000	Santa Cruz #15015
PAX6	Rabbit	1:1000	Covance #PRB-278P
Ash2l	Mouse	1:1000	Abcam #ab50699
MAFB	Rabbit	1:1000	Bethyl #A300-BL658
Immunofluorescence
Target	Host	Concentration	Company and Catalog #
Insulin	Guinea Pig	1:1000	Dako #A0564
MafA	Rabbit	1:500	Novus #NBP1-00121
NCoA6	Rabbit	1:1000	Sigma #HPA004198
Glucagon	Mouse	1:1000	Sigma #G2654
Slc2a2	Goat	1:1000	Santa Cruz #7580
Slc30a8	Rabbit	1:500	Thermo #PA5-21010
EMSA
Target	Host		Company and Catalog #
MafA (mouse)	Rabbit		Bethyl A300-BL1225
MAFA (human)	Rabbit		Novus #NBP1-00121
MAFB (human)	Rabbit		Bethyl A300-BL658
ChIP
Target	Host		Company and Catalog #
IgG	Rabbit		Bethyl #P120-101
MAFA (mouse and human)	Rabbit		Novus #NBP1-00121
MAFB	Rabbit		Bethyl A300-BL658
MLL3 (mouse and human)	Rabbit		Santa Cruz #130173
H3K3 trimethylation	Rabbit		Abcam #ab8580
RNA Pol II (phosphoyrlated)	Rabbit		Abcam #ab5131
