# Supplementary material for: MLL3 and MLL4 Methyltransferases Bind to the MAFA and MAFB Transcription Factors to Regulate Islet β-Cell Function
Source: Oxford University Press journal article supplement (doi:10.2337/db15-0281), 2015-07-15
Supplement: db150281supplementarydata4.xlsx [file db150281supplementarydata4.xlsx]

## Sheet: Table3
Transcription factors	Co-regulators		Other proteins of various functions
Cux1	Ash2l	Dpy30	Otud4	MCM7
Zbtb20	Mll4	HDAC6	Baiap2	NONO
Trps1	Mll3	Uty	Cabin1	SFPQ
Zfhx3	Utx	Wiz	Cpsf1	Matrin-3
Dach2	Rbbp5	HDAC2	RPA1	Ddx5
Dach1	NCoA6	Chd4	SSBP1	Gm5580
Myt1	Ptip	Rbbp7	Kiaa1522	Ddx3x
Myt3	Fmr1	Cdyl	Snrnp200	MCM6
Myt1l	Ehmt2	Rcor3	Mios	Actn4
Hmbox1	Gm10093	Rcor1	Fip1l1	Actn1
znf516	Ehmt1	LSD1	Myef2	Ina
Zfp644	Pa1	Smarca4	Rps3a2	Neurotrimin
Trp53	Wdr5	Smarce1	Elmsan1	Sorbs2
Zhx2	Ogt	Smarca5	Nvl	Ctnnb1
Srfbp1	Chd7	Smarcc2	Pgam5	Ctnna1
Nfic	Sin3a	Taf5l	Wdr33	Plekha6
Baz2b	Hcfc1	Ctbp1	Vrk3	Ubap2
GATAD2A	Trim28	Arid1a	Evi5l	Azi1
Cdc5l	Smarcb1		Usp7	Lmo7
Mox2			Spats2	Dhx9
Dido1			Kpna2
Ubn1
HIRA
Tjp2
Tjp1
COE2
Gtf2i
Cnot1
Trim56
