# Supplementary material for: MLL3 and MLL4 Methyltransferases Bind to the MAFA and MAFB Transcription Factors to Regulate Islet β-Cell Function
Source: Oxford University Press journal article supplement (doi:10.2337/db15-0281), 2015-07-15
Supplement: db150281supplementarydata5.xlsx [file db150281supplementarydata5.xlsx]

## Sheet: Table4
Name	Gene Name	Fold Change	ChIP-seq Peak Height	Peak Distance from TSS
G6pc2	NM_021331	-5.7	18	-257
Ins2	NM_008387	-2.7	12	-92
Slc2a2	NM_031197	-4.1	15	-1586
Slc30a8	NM_172816	-2.6	10	-72
Lifr	NM_001113386	-3.3	11	-306
Sytl4	NM_013757	-8.5	6	12086
Atp2a2	NM_001110140	-3.2	7	959
Prss53	NM_001081268	-6.8	8	969
Rab6	NM_024287	-2.2	9	-7767
			13	117
CyclinD2	NM_009829	-2	7	-68388
